# Supplementary material
Source: Springer Nature journal article supplement (https://www.springermedizin.de/resource/supplementary/12959_2013_223_MOESM1_ESM.pdf/9569328)

did not receive thromboprophylaxis

■ received thromboprophylaxis

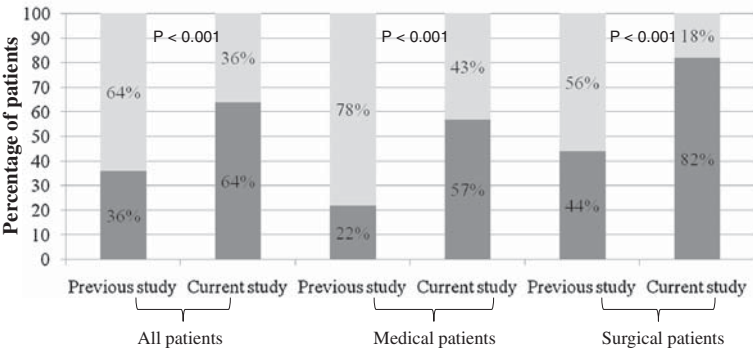

Supplement: MOESM1 [file 9569328]
